# Supplementary material
Source: PubMed Central journal article supplement (PMC4138238)
Supplement: NIHMS598643-supplement-1.pdf [file NIHMS598643-supplement-1.pdf]

## Supplementary Information for

Comprehensive Analysis of Hot Loops at Protein-Protein Interfaces as Targets for  
Macrocyclic Inhibitors

Jason Gavenonis\*, Brad Sheneman\*, Timothy R. Siegert\*, Matt Eshelman and Joshua Kritzer

\*These authors contributed equally to this work

*Department of Chemistry  
Tufts University  
Medford, Massachusetts 02155*

|                                                                                                                                                | Page |
|------------------------------------------------------------------------------------------------------------------------------------------------|------|
| SUPPLEMENTARY NOTE                                                                                                                             |      |
| <b>Defining loop structures by PDBeMotif</b>                                                                                                   | 2    |
| SUPPLEMENTARY RESULTS                                                                                                                          | 6    |
| Supplementary Figure 1. Workflow for using LoopFinder to identify hot loops at PPI interfaces.                                                 | 6    |
| Supplementary Table 1. The full analysis of hot spots from the total interface loop data set of 25,005 structures.                             | 7    |
| Supplementary Table 2. Identical analysis of hot spots conducted for the data set of hot loops only.                                           | 8    |
| Supplementary Figure 2. Relative contributions of hot loops compared to total interface energy.                                                | 9    |
| Supplementary Figure 3. Selected hot loops containing unusual turn motifs                                                                      | 10   |
| Supplementary Figure 4. Amino acid abundance relative to surface propensity for the hot loop set.                                              | 11   |
| Supplementary Figure 5. Comparison of amino acid abundance between hot loops and all interface loops.                                          | 12   |
| Supplementary Figure 6. Loop-mediated PPIs by functional class.                                                                                | 13   |
| Supplementary Figure 7. An alignment of MSL1 across species shows that the region identified as a hot loop is highly conserved across species. | 14   |
| Supplementary Figure 8. A second hot loop in the MOF complex.                                                                                  | 14   |
| Supplementary Table 3. Comparison to experimental alanine scanning for hGH-hGHbp complexes.                                                    | 15   |
| Supplementary Table 4. Checking reproducibility using the online server Robetta.                                                               | 16   |
| Supplementary Table 5. Comparison of LoopFinder results to HippDB results.                                                                     | 18   |
| Supplementary Table 6. Analysis of all interface loops and the hot loop set with respect to protein function.                                  | 24   |
| Supplementary Information References                                                                                                           | 28   |
| Supplementary Data Set 1 (caption) The entire set of hot loops generated by LoopFinder.                                                        | 28   |
| Supplementary Data Set 2. (caption) The subset of 364 hot loops that do not contain two or more consecutive hot spots.                         | 29   |

## SUPPLEMENTARY NOTE

**Defining loop structures using PDBeMotif**

In order to characterize the types of loops identified as hot loops, the list of 1,407 hot loops were subjected to analysis using the PDBeMotif program.<sup>3</sup> For this process, the PDB file for each identified hot loop was truncated with a short Python script to include only the residues in the hot loop and the three amino acids directly N-terminal and C-terminal to the identified hot loop. This results in an instant analysis of backbone torsional angles and hydrogen bonding patterns that exist only within the loop in question. Below is a list of each type of loop as defined by PDBeMotif as well as the requirements used to identify each type of loop.<sup>3</sup> All comments are reproduced from the PDBeMotif definition file. The “nest” and “niche” types of loops were categorized for the purpose of this paper as non-canonical loops due the fact that they lack any organized structural elements such as secondary structure or hydrogen bonding interactions within the loop. In addition to giving analysis of loop structure, PDBeMotif also gives a read out on secondary structure. In this case, if the loop in question was part of an  $\alpha$ -helix, they were defined as such in the analysis, making up the final category of structures identified by LoopFinder.

 **$\alpha\beta$ -motif:**

A motif of 5 consecutive residues and two H-bonds in which:

- H-bond between CO of residue (i) and NH of residue (i+4)
- H-bond between CO of residue (i) and NH of residue (i+3)
- $\phi$  angles of residue (i+1), (i+2) and (i+3) are negative

**asx-motif:**

A motif of 5 consecutive residues and two H-bonds in which:

- residue (i) is aspartate or asparagine (Asx)
- side-chain O of residue (i) is H-bonded to the main-chain NH of residue (i+2) or (i+3)
- main-chain CO of residue (i) is H-bonded to the main-chain NH of residue (i+3) or (i+4)

Comments: A common feature of the C- and N-termini of  $\alpha$ -helices.

**asx-turn:**

A motif of three consecutive residues and one H-bond in which:

- residue (i) is Aspartate or Asparagine (Asx)
- the side-chain O of residue (i) is H-bonded to the main-chain NH of residue (i+2)

Sub-categories:

Type I:

$$\text{residue (i): } -140^\circ < \chi_1 - 120^\circ < -20^\circ \quad -90^\circ < \psi + 120^\circ < 40^\circ$$

residue (i+1):  $-140^\circ < \phi < -20^\circ$   $-90^\circ < \psi < 40^\circ$

Type I':

Left-handed form of Type I

Type II:

residue (i):  $-140^\circ < \chi_1 - 120^\circ < -20^\circ$   $80^\circ < \psi + 120^\circ < 180^\circ$

residue (i+1):  $20^\circ < \phi < 40^\circ$   $-40^\circ < \psi < 90^\circ$

Type II':

Left-handed form of Type II

Comments: about half of the asx-turns are found at the N-termini of  $\alpha$ -helices

### beta-bulge:

A motif of three residues within a  $\beta$ -sheet in which the main chains of two consecutive residues are H-bonded to that of the third, and in which the dihedral angles are as follows:

residue (i):  $-140^\circ < \phi < -20^\circ$   $-90^\circ < \psi < 40^\circ$

residue (i+1):  $-180^\circ < \phi < -25^\circ$  or  $120^\circ < \phi < 180^\circ$

$40^\circ < \psi < 180^\circ$  or  $-180^\circ < \psi < -120^\circ$

Comments: classic  $\beta$ -bulges are mostly found at the edges of the sheets

### beta-bulge-loop(5 or 6):

A motif of three residues within a  $\beta$ -sheet consisting of two H-bonds in which:

-the main-chain NH of residue (i) is H-bonded to the main-chain CO of residue (i+4) (Type 5) or residues (i+5) (Type 6)

-the main-chain CO of residue (i) is H-bonded to the main-chain NH of residue (i+3) (Type 5) or residue (i+4) (Type 6)

Type 1  $\beta$ -bulge loops have an RL nest at residues i+2 and i+3

Type 2  $\beta$ -bulge loops have an RL nest at residues i+3 and i+4

Comments:  $\beta$ -bulge loops often occur at the loop ends of  $\beta$ -hairpins

### Beta-turn:

A motif of four consecutive residues that may contain one H-bond, which, if present, is between the main-chain CO of the first residue and the main-chain NH of the fourth. It is characterized by the dihedral angles of the second and third residues, which are the basis for the sub-categorization:

Sub-categories:

Type I:

residue (i+1):  $-140^\circ < \phi < -20^\circ$   $-90^\circ < \psi < 40^\circ$

residue (i+2):  $-140^\circ < \phi < -20^\circ$   $-90^\circ < \psi < 40^\circ$

Type I':

Left-handed form of Type I

Type II:

residue (i+1):  $-140^\circ < \phi < -20^\circ$   $80^\circ < \psi < 180^\circ$

residue (i+2):  $20^\circ < \phi < 140^\circ$   $-40^\circ < \psi < 90^\circ$

Type II':

Left-handed form of Type II

Comments: The most common of the small protein motifs. The service presents hydrogen bonded motifs only at the distance between the first and last residues C  $\alpha$  atoms must be less than 7 Å. Also the dihedral angles were restricted to not fall into the helical region for the first and the last residues or for the middle two residues.

### Gamma-turn:

A motif of three consecutive residues i, i+1, i+2 and one H-bond in which:

-the main-chain O of residue (i) is H-bonded to the main-chain NH of residue (i+2)

Sub-categories:

Classic:

residue (i+1):  $35^\circ < \phi < 115^\circ$   $-104^\circ < \psi < -24^\circ$

Inverse:

residue (i+1):  $-115^\circ < \varphi < -35^\circ$   $24^\circ < \psi < 104^\circ$

Comments:

### Nest:

A motif of two consecutive residues with dihedral angles as follows:

Sub-categories:

Type RL:

residue (i):  $-140^\circ < \varphi < -20^\circ$   $-90^\circ < \psi < 40^\circ$

residue (i+1):  $20^\circ < \varphi < 140^\circ$   $-40^\circ < \psi < 90^\circ$

Type LR:

In LR nests the values for (i) and (i+1) are interchanged

Comments: Nest should not have any prolines. The nest can form a binding site for an anionic group ('the egg'). Nests frequently occur as parts of other motifs such as schellmann loops.

### Niche-3l:

A motif of 3 consecutive residues with dihedral angles as follows:

residue (i-1): no limitations

residue (i):  $-120^\circ < \varphi < -60^\circ$   $-50^\circ < \psi < 30^\circ$

residue (i+1):  $-100^\circ < \varphi < -50^\circ$   $110^\circ < \psi < 170^\circ$

Comments: This version of the database contains motifs with the amended definition. The criteria used was that the distance between i-1 and i+1 oxygen atoms must be within 4.5Å, both C-O vectors must look towards each other and the residues must not fall into the helical region.

### Niche-3r:

A motif of 3 consecutive residues with dihedral angles as follows:

residue (i-1): no limitations

residue (i):  $-120^\circ < \varphi < -60^\circ$   $-50^\circ < \psi < 30^\circ$

residue (i+1):  $-100^\circ < \varphi < -50^\circ$   $110^\circ < \psi < 170^\circ$

Comments: This version of the database contains motifs with the amended definition. The criteria used was that the distance between i-1 and i+1 oxygen atoms must be within 4.5Å, both C-O vectors must look towards each other and the residues must not fall into the helical region.

### Niche-4l:

A motif of 4 consecutive residues with dihedral angles as follows:

residue (i-1): no limitations

residue (i):  $-160^\circ < \varphi < -30^\circ$   $90^\circ < \psi < 180^\circ$

residue (i+1):  $50^\circ < \varphi < 140^\circ$   $-40^\circ < \psi < 50^\circ$

residue (i+2):  $-160^\circ < \varphi < -30^\circ$   $90^\circ < \psi < 180^\circ$

Comments: According to these definitions, virtually all niche4s incorporate a niche3. This version of the database contains motifs with the amended definition. The criteria used was that the distance between i-1 and i+1 oxygen atoms must be within 4.5Å, both C-O vectors must look towards each other and the residues must not fall into the helical region.

### Niche-4r:

A motif of 4 consecutive residues with dihedral angles as follows:

residue (i-1): no limitations

residue (i):  $-160^\circ < \varphi < -30^\circ$   $90^\circ < \psi < 180^\circ$

residue (i+1):  $-140^\circ < \varphi < -50^\circ$   $-50^\circ < \psi < 40^\circ$

residue (i+2):  $-160^\circ < \varphi < -30^\circ$   $90^\circ < \psi < 180^\circ$

Comments: According to these definitions, virtually all niche4s incorporate a niche3. This version of the database contains motifs with the amended definition. The criteria used was that

the distance between  $i-1$  and  $i+1$  oxygen atoms must be within  $4.5\text{\AA}$ , both C-O vectors must look towards each other and the residues must not fall into the helical region.

### Schellman-loop-6:

A motif of six consecutive residues (common type) or seven consecutive residues (wide type) that contains two H-bonds in which:

- the main-chain CO of residue ( $i$ ) is H-bonded to the main-chain NH of residue ( $i+5$ ) (common type) or residue ( $i+6$ ) (wide type)
- the main-chain CO of residue ( $i+1$ ) is H-bonded to the main-chain NH of residue ( $i+4$ ) (common type) or residue ( $i+5$ ) (wide type)

Comments: The common Schellman Loop contains an RL Nest at positions ( $i+3$ ) and ( $i+4$ ), whereas the wide type contains one at positions ( $i+4$ ) and ( $i+5$ ). Schellman Loops are a common feature of the C-termini of  $\alpha$ -helices.

### ST-motif:

A motif of 5 consecutive residues and two H-bonds in which:

- residue ( $i$ ) is Serine (S) or Threonine (T)
- side-chain O of residue ( $i$ ) is H-bonded to the main-chain NH of residue ( $i+2$ ) or ( $i+3$ )
- main-chain CO of residue ( $i$ ) is H-bonded to the main-chain NH of residue ( $i+3$ ) or ( $i+4$ )

Comments: the ST-motif is analogous to the Asx-motif, with the oxygen of the hydroxyl side-chain replacing that of the acid or amide.

### ST-staple:

A motif of four or five consecutive residues and one H-bond in which:

- residue ( $i$ ) is Serine (S) or Threonine (T)
- the side-chain OH of residue ( $i$ ) is H-bonded to the main-chain CO of residue ( $i-3$ ) or ( $i-4$ )
- $\phi$  angles of residues ( $i-1$ ), ( $i-2$ ) and ( $i-3$ ) are negative

Comments: This is a common feature in the middle part of  $\alpha$ -helices. The Ser or Thr side-chain can be regarded as stapling together two adjacent turns of the  $\alpha$ -helices.

### ST-turn:

A motif of three consecutive residues and one H-bond in which:

- residue ( $i$ ) is Serine (S) or Threonine (T)
- the side-chain O of residue ( $i$ ) is H-bonded to the main-chain NH of residue ( $i+2$ )

Sub-categories:

Type I:

$$\begin{aligned} \text{residue } (i+1): & -140^\circ < \chi_1 - 120^\circ < -20^\circ \quad -90^\circ < \psi + 120^\circ < 40^\circ \\ \text{residue } (i+2): & -140^\circ < \phi < -20^\circ \quad -90^\circ < \psi < 40^\circ \end{aligned}$$

Type I':

Left-handed form of Type I

Type II:

$$\begin{aligned} \text{residue } (i+1): & -140^\circ < \chi_1 - 120^\circ < -20^\circ \quad 80^\circ < \psi + 120^\circ < 180^\circ \\ \text{residue } (i+2): & 20^\circ < \phi < 140^\circ \quad -40^\circ < \psi < 90^\circ \end{aligned}$$

Type II':

Left-handed form of Type II

Comments: The ST-turn is analogous to the Asx-turn, with the oxygen of the hydroxyl side-chain replacing that of the acid or amide.

## SUPPLEMENTARY RESULTS

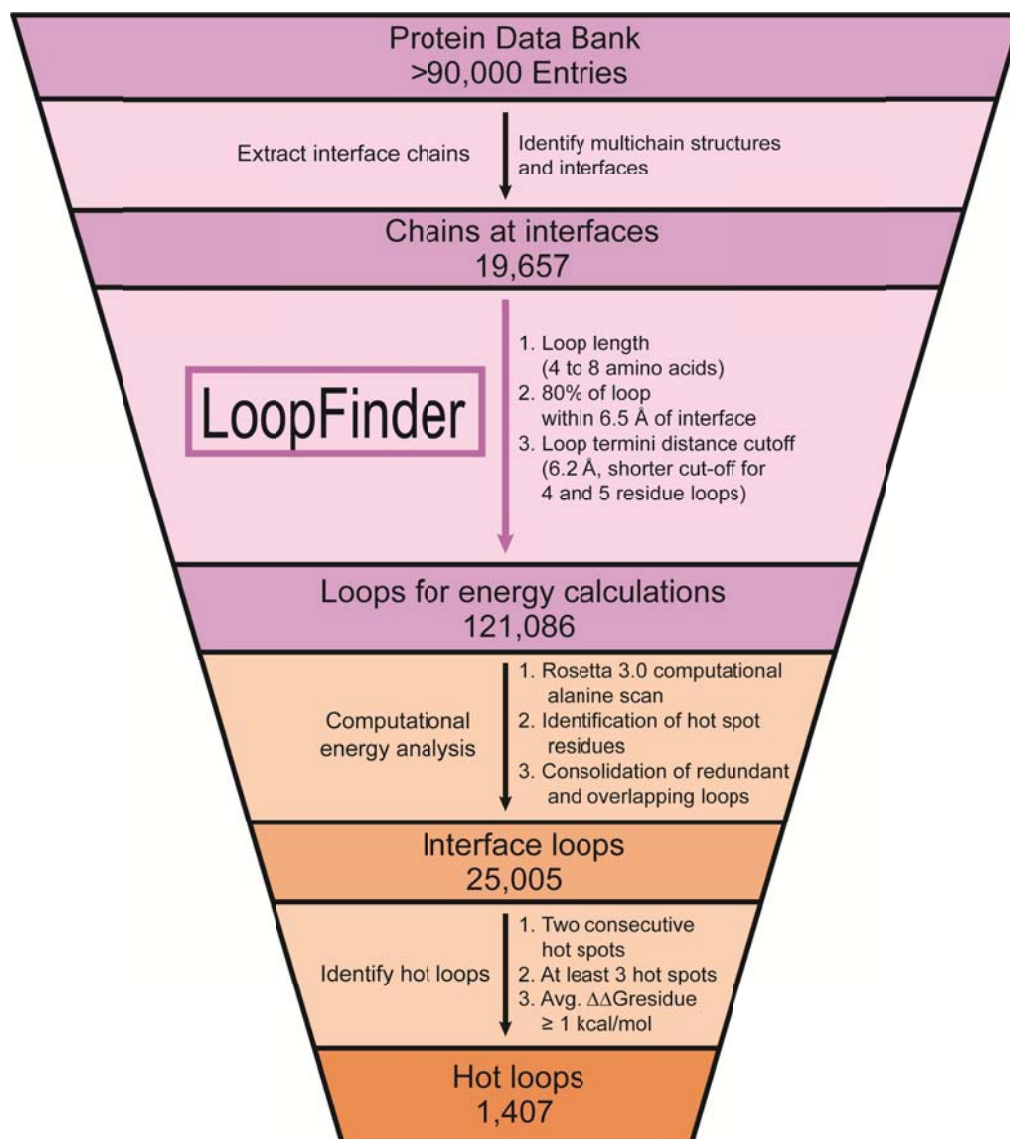

**Supplementary Figure 1.** Workflow for using LoopFinder to identify hot loops at PPI interfaces. LoopFinder was used to analyze all heterogeneous protein-protein complexes in the PDB, identifying just over 121,000 loops at protein-protein interfaces with the given structural parameters. These loop regions were subjected to computational alanine scan mutagenesis using Rosetta to calculate the relative contributions of each residue to the PPI.<sup>14,15</sup> The resulting data were consolidated into a set of 25,005 interface loops, representing a non-redundant set of all loops that mediate PPIs, each with complete computational alanine scan data. The interface loop set was further sorted by key criteria in order to identify those loops containing large proportions of the overall binding energy of the PPI. These comprise the set of 1,407 hot loops.

**Supplementary Table 1. The full analysis of hot spots from the total interface loop data set of 25,005 structures.** The avg.  $\Delta\Delta G$  value for each amino acid, in alphabetical order, is shown in the first column. The total number of each amino acid present in the interface loop data set is shown in the second column followed directly by the percent abundance of each amino acid:  $\left(\frac{\text{number of each amino acid (column 2)}}{\text{total number of amino acids in all loops}} \times 100\right)$ . The number that each amino acid appears as a hot spot, and the percent of each amino acid that occurs as a hot spot  $\left(\frac{\text{Number of each amino acid that are hot spots}}{\text{number of each amino acid (column 2)}} \times 100\right)$ . In order to identify which amino acids are favored as hot spots, the fold enrichment was calculated:

$$\left(\frac{\text{number of each amino acid that are hot spots}/\text{total number of hot spots for all residues}}{\text{number of each amino acid (column 2)}/\text{total number of all amino acids in all loops}} \times 100\right).$$

**Amino Acid Analysis of Hot Spots in All Loops**

| Residue | Average $\Delta\Delta G_{\text{residue}}$ | Total # of amino acids | Percent Abundance | Contributes $\geq 1$ kcal/mol |       | Fold Enrichment in Hot Spots | Contributes $\geq 2$ kcal/mol |       | Fold Enrichment in Hot Spots |
|---------|-------------------------------------------|------------------------|-------------------|-------------------------------|-------|------------------------------|-------------------------------|-------|------------------------------|
|         |                                           |                        |                   | (total)                       | (%)   |                              | (total)                       | (%)   |                              |
| Ala     | 0.01                                      | 12341                  | 7.95              | 98                            | 0.79  | 0.13                         | 80                            | 0.65  | 0.36                         |
| Arg     | 0.07                                      | 8184                   | 5.27              | 696                           | 8.50  | 1.36                         | 184                           | 2.25  | 1.26                         |
| Asn     | 0.08                                      | 7560                   | 4.87              | 352                           | 4.66  | 0.74                         | 98                            | 1.30  | 0.72                         |
| Asp     | 0.21                                      | 9169                   | 5.91              | 881                           | 9.61  | 1.54                         | 235                           | 2.56  | 1.43                         |
| Cys     | -0.03                                     | 2291                   | 1.48              | 27                            | 1.18  | 0.19                         | 13                            | 0.57  | 0.32                         |
| Gln     | -0.02                                     | 5378                   | 3.47              | 165                           | 3.07  | 0.49                         | 39                            | 0.73  | 0.41                         |
| Glu     | 0.15                                      | 9199                   | 5.93              | 730                           | 7.94  | 1.27                         | 217                           | 2.36  | 1.32                         |
| Gly     | 0.00                                      | 19786                  | 12.75             | 0                             | 0.00  | 0.00                         | 0                             | 0.00  | 0.00                         |
| His     | 0.27                                      | 3924                   | 2.53              | 619                           | 15.77 | 2.52                         | 163                           | 4.15  | 2.32                         |
| Ile     | 0.14                                      | 6502                   | 4.19              | 592                           | 9.10  | 1.46                         | 116                           | 1.78  | 1.00                         |
| Leu     | 0.15                                      | 12020                  | 7.75              | 1048                          | 8.72  | 1.39                         | 148                           | 1.23  | 0.69                         |
| Lys     | 0.03                                      | 7403                   | 4.77              | 309                           | 4.17  | 0.67                         | 64                            | 0.86  | 0.48                         |
| Met     | 0.01                                      | 2955                   | 1.90              | 117                           | 3.96  | 0.63                         | 31                            | 1.05  | 0.59                         |
| Phe     | 0.28                                      | 6275                   | 4.04              | 1201                          | 19.14 | 3.06                         | 341                           | 5.43  | 3.04                         |
| Pro     | 0.09                                      | 7245                   | 4.67              | 405                           | 5.59  | 0.89                         | 230                           | 3.17  | 1.77                         |
| Ser     | 0.09                                      | 10503                  | 6.77              | 398                           | 3.79  | 0.61                         | 117                           | 1.11  | 0.62                         |
| Thr     | 0.09                                      | 8639                   | 5.57              | 372                           | 4.31  | 0.69                         | 123                           | 1.42  | 0.80                         |
| Trp     | 0.30                                      | 1980                   | 1.28              | 423                           | 21.36 | 3.42                         | 221                           | 11.16 | 6.24                         |
| Tyr     | 0.17                                      | 5714                   | 3.68              | 904                           | 15.82 | 2.53                         | 223                           | 3.90  | 2.18                         |
| Val     | 0.12                                      | 8092                   | 5.22              | 367                           | 4.54  | 0.73                         | 134                           | 1.66  | 0.93                         |

**Supplementary Table 2. Identical analysis of hot spots conducted for the data set of hot loops only.**

Upon comparison to Supplementary Table 1, conclusions can be made as to which amino acid residues are most likely to be contained within a hot loop.

**Amino Acid Analysis of Hot Spots in All Loops**

| Residue | Average $\Delta\Delta G_{\text{residue}}$ | Total # of amino acids | Percent Abundance | Contributes $\geq 1$ kcal/mol |       | Fold Enrichment in Hot Spots | Contributes $\geq 2$ kcal/mol |       | Fold Enrichment in Hot Spots |
|---------|-------------------------------------------|------------------------|-------------------|-------------------------------|-------|------------------------------|-------------------------------|-------|------------------------------|
|         |                                           |                        |                   | (total)                       | (%)   |                              | (total)                       | (%)   |                              |
| Ala     | 0.30                                      | 468                    | 5.39              | 36                            | 7.69  | 0.22                         | 32                            | 6.84  | 0.54                         |
| Arg     | 0.83                                      | 545                    | 6.28              | 234                           | 42.94 | 1.23                         | 67                            | 12.29 | 0.97                         |
| Asn     | 0.56                                      | 418                    | 4.82              | 99                            | 23.68 | 0.68                         | 40                            | 9.57  | 0.76                         |
| Asp     | 0.97                                      | 597                    | 6.88              | 284                           | 47.57 | 1.37                         | 80                            | 13.40 | 1.06                         |
| Cys     | 0.37                                      | 97                     | 1.12              | 11                            | 11.34 | 0.33                         | 7                             | 7.22  | 0.6                          |
| Gln     | 0.53                                      | 246                    | 2.84              | 61                            | 24.80 | 0.71                         | 21                            | 8.54  | 0.68                         |
| Glu     | 0.86                                      | 613                    | 7.06              | 262                           | 42.74 | 1.23                         | 87                            | 14.19 | 1.12                         |
| Gly     | 0.00                                      | 860                    | 9.91              | 0                             | 0.00  | 0.00                         | 0                             | 0.00  | 0.00                         |
| His     | 1.07                                      | 319                    | 3.68              | 181                           | 56.74 | 1.63                         | 60                            | 18.81 | 1.49                         |
| Ile     | 0.95                                      | 368                    | 4.24              | 165                           | 44.84 | 1.29                         | 49                            | 13.32 | 1.05                         |
| Leu     | 0.83                                      | 659                    | 7.59              | 294                           | 44.61 | 1.28                         | 65                            | 9.86  | 0.78                         |
| Lys     | 0.50                                      | 348                    | 4.01              | 99                            | 28.45 | 0.82                         | 27                            | 7.76  | 0.61                         |
| Met     | 0.55                                      | 119                    | 1.37              | 29                            | 24.37 | 0.70                         | 13                            | 10.92 | 0.86                         |
| Phe     | 1.29                                      | 484                    | 5.58              | 318                           | 65.70 | 1.89                         | 113                           | 23.35 | 1.85                         |
| Pro     | 1.27                                      | 459                    | 5.29              | 183                           | 39.87 | 1.15                         | 125                           | 27.23 | 2.16                         |
| Ser     | 0.59                                      | 594                    | 6.85              | 155                           | 26.09 | 0.75                         | 54                            | 9.09  | 0.72                         |
| Thr     | 0.75                                      | 470                    | 5.42              | 140                           | 29.79 | 0.86                         | 52                            | 11.06 | 0.88                         |
| Trp     | 1.55                                      | 186                    | 2.14              | 116                           | 62.37 | 1.79                         | 78                            | 41.94 | 3.32                         |
| Tyr     | 1.11                                      | 408                    | 4.70              | 233                           | 57.11 | 1.64                         | 70                            | 17.16 | 1.36                         |
| Val     | 0.74                                      | 419                    | 4.83              | 120                           | 28.64 | 0.82                         | 56                            | 13.37 | 1.06                         |



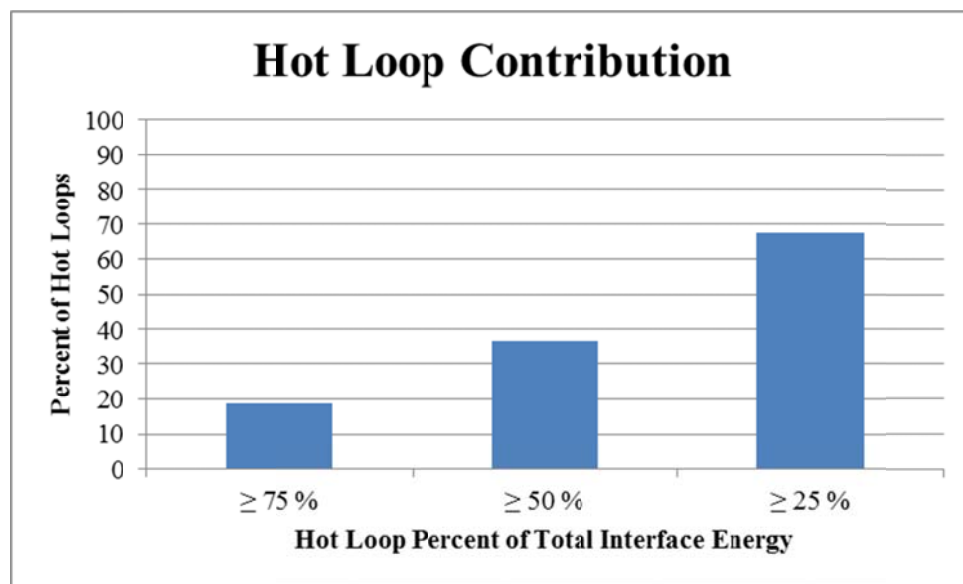

**Supplementary Figure 2. Relative contributions of hot loops compared to total interface energy.**

The contribution of hot loops to the interface energy calculated for the entire chain was analyzed. The resulting contributions show that, on the whole, the hot loops identified by LoopFinder comprise a significant percentage of the total interface energy.

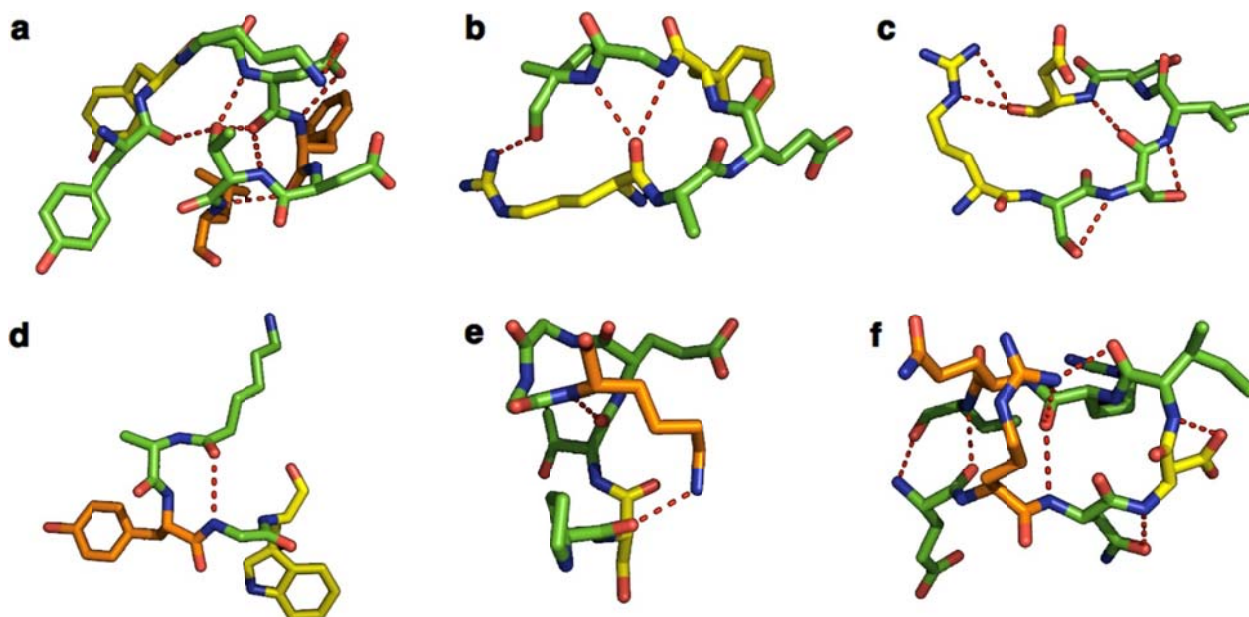

**Supplementary Figure 3. Selected hot loops containing unusual turn motifs.** a) An interface loop from *Borrelia burgdorferi* BbCRASP-1 with three non-consecutive hydrophobic hot spots constrained by an  $(i,i+1)$  salt bridge and a central threonine with an  $(i,i-3;i,i-6)$  ST-staple (1W33). b) An interface loop from the *Mycobacterium tuberculosis* toxin-antitoxin complex RelBE2 with a bidentate  $(i,i+4;i,i+5)$  main-chain hydrogen bond at the C-terminal end of an alpha helix (3G5O). c) An interface loop that contains a  $\beta$ -turn with non-standard backbone torsional angles and two  $(i,i+1)$  side-chain-to-backbone hydrogen bonds (3OA8); d) An interface loop from *Plasmodium falciparum* thioredoxin reductase that contains a  $\beta$ -turn with non-standard backbone torsional angles at the C-terminal end of an  $\alpha$ -helix (4B1B). e) An interface loop from potassium ion channel Trek2 with a side-chain-to backbone hydrogen bond from lysine at the N-terminal end of an  $\alpha$ -helix (4BW5). f) An interface loop from R-spondin-1 with a  $\beta$ -hairpin-like structure containing an  $(i,i+4)$  hydrogen bond and side-chain-to-backbone hydrogen bonds among Arg  $(i,i+3;i,i+4)$ , Asn  $(i,i+1)$ , and Asp  $(i,i+1)$ , with both charged residues also being hot spots (4KNG). All structures, rendered in Pymol,<sup>46</sup> show the hot loop in green, and hot spots in orange ( $\Delta\Delta G_{\text{residue}} \geq 1$  kcal/mol) or yellow ( $\Delta\Delta G_{\text{residue}} \geq 2$  kcal/mol).

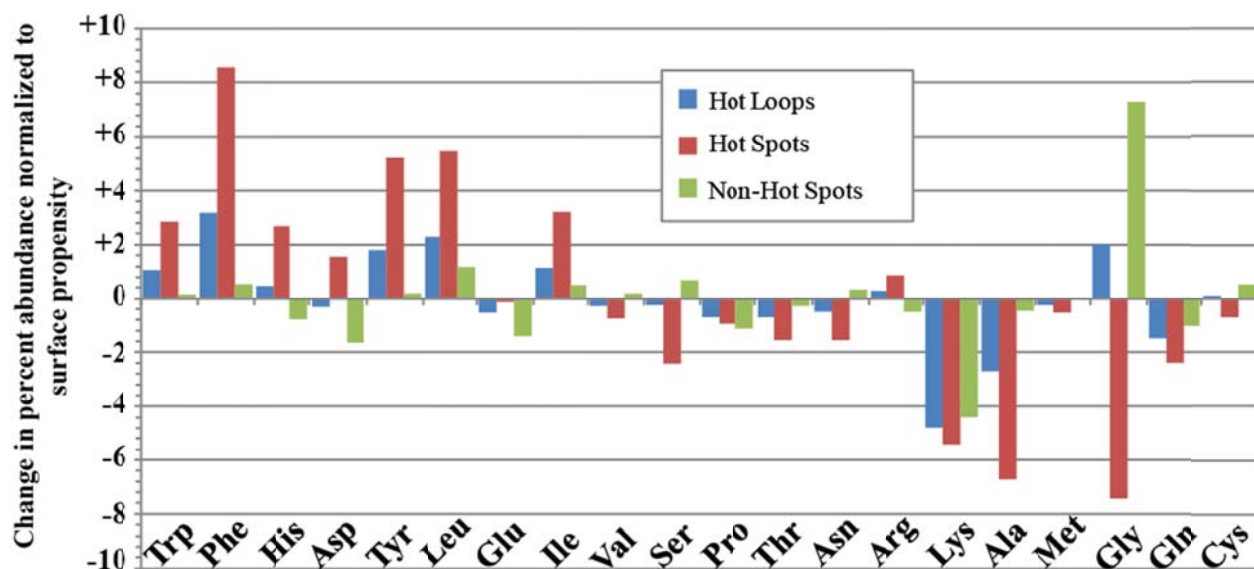

**Supplementary Figure 4. Amino acid abundance relative to surface propensity for the hot loop set.**

The percent abundance of each amino acid in the hot loop data (blue), hot spot residues (red) and non-hot spot residues (green) was compared directly to the natural surface percent abundance of each amino acid as identified previously by Janin *et al.* in order to analyze which amino acids are over-represented at surface hot loops that take part in PPIs.<sup>4</sup> This figure is similar to Figure 3 in the main text, but uses only hot loop data instead of the full interface loop set.

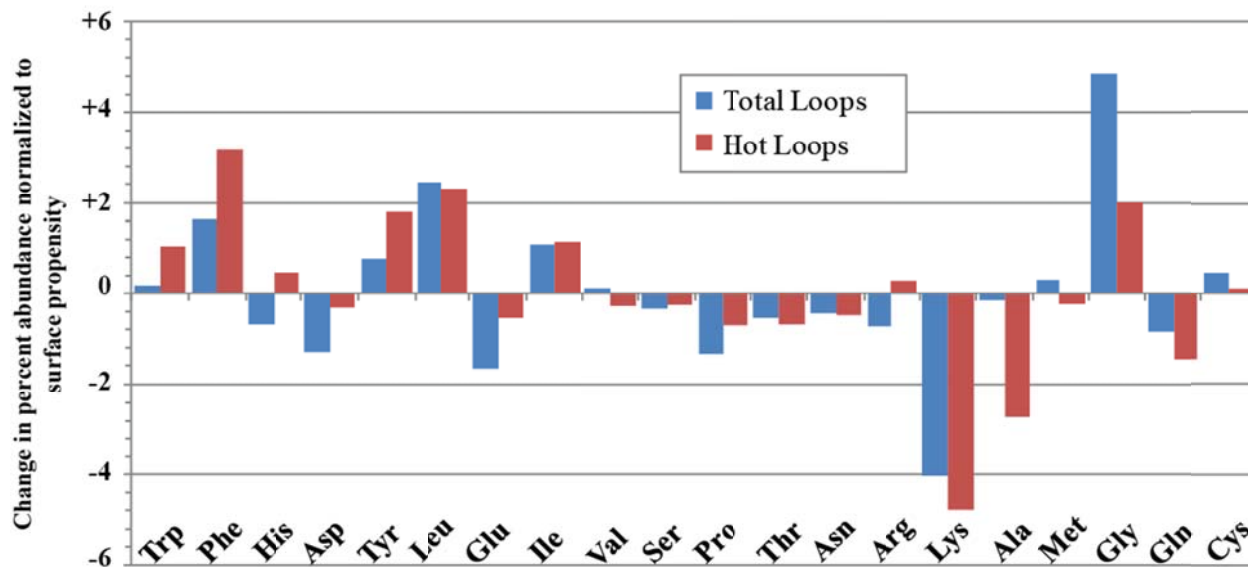

**Supplementary Figure 5. Comparison of amino acid abundance between hot loops and all interface loops.** A comparison of the amino acid percent abundance, normalized to surface propensity as measured by Janin *et al.*, for total interface loops (blue) and hot loops (red). These data are re-plotted here in one plot to show similarities in amino acid distribution at hot loops compared to the total interface loop set.<sup>4</sup>

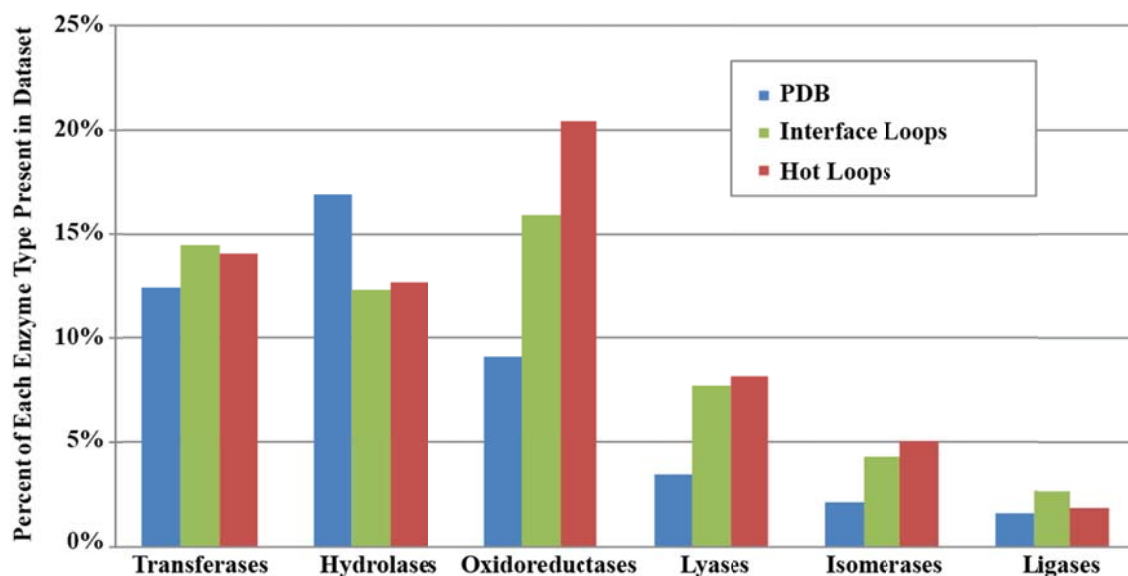

**Supplementary Figure 6. Loop-mediated PPIs by functional class.** Enzymes make up the largest class of proteins with loop-mediated PPIs. Percentages of each enzyme type are shown for the total PDB (blue), the 25,005 interface loops identified by LoopFinder (red), and the 1,407 hot loops (green). The 25,005 interface loops identified by LoopFinder covers 499 different functional classes of proteins from all kingdoms of life, as well as viral proteins. The 1,407 hot loops, by contrast, cover only 132 functions of proteins (Supplementary Data Set 1). The functional classes with the highest number of hot loops are the common classes of enzymes: hydrolases, isomerases, lyases, oxidoreductases, transferases, and ligases. This is not surprising given their prominence in the PDB as a whole. When representation of each enzyme type within the interface loop set and the hot loop set are compared to representation in the input PDB set (as shown here), it is clear that oxidoreductases are over-represented in the interface loop set, and are even more prominent in the hot loop set. Lyases and isomerases show a similar but less prominent trend, and hydrolases show the opposite trend. We conclude that oxidoreductases form loop-mediated PPIs more often than other types of enzymes. Further analysis will illuminate the reason for this over-representation.

|            |     |                                                     |
|------------|-----|-----------------------------------------------------|
| HUMAN      | 551 | TSFFPEPDDVESLMITPFLPVVAFGR-PLPKLTPQNFELPWLDESR---   |
| MOUSE      | 554 | TSFFPEPDDVESLLITPFLPVVAFGR-PLPKLAPQNFELPWLDESR---   |
| CHIMP      | 289 | TSFFPEPDDVESLMITPFLPVVAFGR-PLPKLTPQNFELPWLDESR---   |
| ZEBRAFISH  | 427 | LSFHAEPEDEVYIMVTPFLPVVAFGR-PLPNLKQQDFDLPWLDESR---   |
| SALMON     | 473 | SSFYPDTEDEVESIIITPFLPVVAFGR-PLPKLTQQNFELPWLDESR---  |
| TETRAODON  | 364 | SSFYPDTEDEVETIVITPFLPVVAFGR-PLPKLSQENFELPWLDDRSR--- |
| DROSOPHILA | 943 | STFYPLPEDIEAIQFVNEVTVQAFGENVVNMEARDDFGVPWVDAIEAPTS  |

**Supplementary Figure 7. An alignment of MSL1 across species shows that the region identified as a hot loop is highly conserved across species.** In the green box are the loop members that do not contribute significantly to binding. In the yellow box are the hot spot residues identified to contribute significantly to the binding energy.

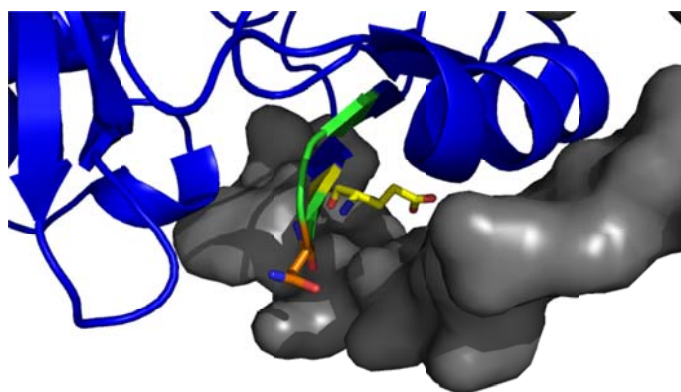

**Supplementary Figure 8. A second hot loop in the MOF complex.** The binding interaction between MOF and MSL1 was also identified by LoopFinder (4DNC).<sup>8</sup> The epitope of MOF isolated by LoopFinder ranges from His183 to Glu188 (HIGNYE) with hot spots identified in yellow (Glu188,  $\Delta\Delta G_{\text{residue}} = 3.23$  kcal/mol) and orange (Asn186,  $\Delta\Delta G_{\text{residue}} = 1.54$  kcal/mol). This crystal structure was made using only MSL1, a single component of the MSL complex. It is hypothesized that this same interaction would be present in the full complex structure and allow for the design of an inhibitor aimed at disrupting MOFs ability to bind its activating complex. All structures, rendered in Pymol,<sup>9</sup> show the hot loop in green, and hot spots in orange ( $\Delta\Delta G_{\text{residue}} \geq 1$  kcal/mol) or yellow ( $\Delta\Delta G_{\text{residue}} \geq 2$  kcal/mol).

**Supplementary Table 3. Comparison to experimental alanine scanning for hGH-hGHbp complexes.** Alanine scanning mutagenesis has been extensively done to study the binding of hGH to its hGHbp partner.<sup>5-7</sup> A comparison of mutagenesis results from experimental data is made to the computational data used to identify hot loop for both hGH and hGHbp in two crystal structures isolated in the LoopFinder process. Though the values from the computational alanine scan are not exactly the same as experimental values, the magnitudes are similar. Experimentally, these loops were identified as highly important for the hGH:hGHbp interaction, confirming our approach for identifying hot loops.

| hGH Loop | Experimental $\Delta\Delta G_{\text{residue}}$ (kcal/mol) | Computational |      | hGHbp Loop | Experimental $\Delta\Delta G_{\text{residue}}$ (kcal/mol) | Computational |      |
|----------|-----------------------------------------------------------|---------------|------|------------|-----------------------------------------------------------|---------------|------|
|          |                                                           | 1HWG          | 1AXI |            |                                                           | 1HWG          | 1AXI |
| P61      | 1.2                                                       | 0             | 0    | I165       | 2.0                                                       | 0.0           | 4.5  |
| S62      | 0.1                                                       | -0.15         | 0    | Q166       | 0                                                         | 0.0           | 0.1  |
| N63      | 0.3                                                       | 4.5           | 0.4  | K167       | 0                                                         | 0.3           | 0.3  |
| R64      | 1.6                                                       | 1.9           | 1.8  | G168       | n/a                                                       | 0.0           | 0.0  |
| E65      | -0.5                                                      | 0.22          | 0    | W169       | 4.5                                                       | -1.1          | 2.4  |
| E66      | n/a                                                       | 0             | 0    | M170       | n/a                                                       | 0.0           | 0.0  |

n/a = no experimental data available

**Supplementary Table 4. Checking reproducibility using the online server Robetta.** 19 hot loops generated by LoopFinder, each with 3 non-consecutive hotspots, were compared with hot spots calculated independently using the Robetta computational alanine scan server (<http://robetta.bakerlab.org/>). 57 hot spots were identified using our score function and 54 were identified by Robetta. In total, 44 hot spots (77%) were identified by both methods. Of the hot loops identified, only one (2GE7:A58-63) would be excluded from the hot loop set using this alternate set of  $\Delta\Delta G$  values. Underlined residues were identified by both methods; bold by LoopFinder only, italicized by Robetta only.

| PDB                            | CHAIN | FIRST  | LAST   | AA1               | AA2               | AA3               | AA4               | AA5               | AA6               | AA7               | AA8               |
|--------------------------------|-------|--------|--------|-------------------|-------------------|-------------------|-------------------|-------------------|-------------------|-------------------|-------------------|
| 1IAI                           | L     | HIS91  | PHE96  | <u>HIS</u>        | TYR               | SER               | <b>THR</b>        | PRO               | <u>PHE</u>        |                   |                   |
| 1J34                           | A     | GLU82  | SER87  | GLU               | <u>TRP</u>        | SER               | <b>ASP</b>        | GLY               | <b>SER</b>        |                   |                   |
| 1MTP                           | B     | ARG347 | LEU353 | <u>ARG</u>        | <i>ARG</i>        | <i>ARG</i>        | GLY               | ALA               | <i>ILE</i>        | <u>LEU</u>        |                   |
| 1XIM                           | D     | SER106 | ARG112 | SER               | <u>ASN</u>        | ASP               | <u>ARG</u>        | SER               | VAL               | <u>ARG</u>        |                   |
| 2DVT                           | A     | LEU182 | TRP187 | <u>LEU</u>        | LEU               | GLY               | <b>PRO</b>        | <i>THR</i>        | <u>TRP</u>        |                   |                   |
| 2GE7                           | A     | PRO58  | CYS63  | <b>PRO</b>        | SER               | SER               | HIS               | ALA               | <b>CYS</b>        |                   |                   |
| 2IUF                           | E     | ALA33  | ALA38  | <b>ALA</b>        | GLY               | <i>GLN</i>        | <b>ARG</b>        | GLY               | <b>ALA</b>        |                   |                   |
| 2OIZ                           | D     | ARG147 | LEU154 | <u>ARG</u>        | PRO               | GLY               | <u>TYR</u>        | GLU               | <u>PHE</u>        | PHE               | LEU               |
| 2QLZ                           | A     | LEU84  | PHE89  | <u>LEU</u>        | <i>THR</i>        | <b>PRO</b>        | GLU               | N/A               | <u>PHE</u>        |                   |                   |
| 2QNR                           | B     | LEU257 | VAL262 | LEU               | <u>TYR</u>        | PRO               | <u>TRP</u>        | GLY               | <b>VAL</b>        |                   |                   |
| 3B7E                           | A     | ALA138 | HIS144 | ALA               | <u>LEU</u>        | LEU               | <b>ASN</b>        | <b>ASP</b>        | <i>LYS</i>        | <u>HIS</u>        |                   |
| 3FSL                           | A     | ARG292 | SER296 | <u>ARG</u>        | <i>ARG</i>        | <i>ASN</i>        | TYR               | <i>SER</i>        |                   |                   |                   |
| 3GWA                           | A     | ASP92  | SER98  | ASP               | <u>TYR</u>        | <i>VAL</i>        | <u>LEU</u>        | PRO               | <u>THR</u>        | SER               |                   |
| 3HMU                           | A     | THR90  | THR95  | THR               | <u>PHE</u>        | <i>PHE</i>        | <u>LYS</u>        | THR               | <u>THR</u>        |                   |                   |
| 3OCD                           | A     | ARG238 | ALA244 | <u>ARG</u>        | GLN               | MET               | <u>ARG</u>        | MET               | <b>PRO</b>        | ALA               |                   |
| 3STH                           | B     | MET305 | LYS312 | MET               | <u>LEU</u>        | ASN               | ASP               | THR               | <u>PHE</u>        | VAL               | <u>LYS</u>        |
| 3VTO                           | C     | HIS108 | ARG113 | <u>HIS</u>        | HIS               | <u>GLU</u>        | GLY               | HIS               | ARG               |                   |                   |
| 4EHI                           | A     | HIS361 | PHE366 | <u>HIS</u>        | <i>ILE</i>        | <u>ASP</u>        | GLY               | GLY               | <u>PHE</u>        |                   |                   |
| 4HST                           | B     | LEU37  | ASP43  | <u>LEU</u>        | ALA               | <b>CYS</b>        | ASP               | <b>ARG</b>        | <i>PHE</i>        | ASP               |                   |
| <b>Loopfinder Alanine Scan</b> |       |        |        |                   |                   |                   |                   |                   |                   |                   |                   |
| PDB                            | CHAIN | FIRST  | LAST   | $\Delta\Delta G1$ | $\Delta\Delta G2$ | $\Delta\Delta G3$ | $\Delta\Delta G4$ | $\Delta\Delta G5$ | $\Delta\Delta G6$ | $\Delta\Delta G7$ | $\Delta\Delta G8$ |
| 1IAI                           | L     | HIS91  | PHE96  | 1.88              | 0.00              | 0.00              | 4.50              | 0.04              | 1.46              |                   |                   |
| 1J34                           | A     | GLU82  | SER87  | 0.00              | 3.24              | 0.96              | 1.80              | 0.00              | 1.23              |                   |                   |
| 1MTP                           | B     | ARG347 | LEU353 | 2.67              | -0.51             | 2.88              | 0.00              | 0.01              | 0.45              | 1.54              |                   |
| 1XIM                           | D     | SER106 | ARG112 | 0.00              | 2.52              | 0.32              | 2.02              | 0.54              | 0.13              | 1.90              |                   |
| 2DVT                           | A     | LEU182 | TRP187 | 1.18              | 0.00              | 0.00              | 2.81              | 0.90              | 2.93              |                   |                   |
| 2GE7                           | A     | PRO58  | CYS63  | 4.15              | 0.27              | -0.07             | 1.77              | 0.00              | 1.48              |                   |                   |
| 2IUF                           | E     | ALA33  | ALA38  | 1.16              | 0.00              | 0.50              | 1.77              | 0.00              | 4.50              |                   |                   |
| 2OIZ                           | D     | ARG147 | LEU154 | 3.12              | -0.05             | 0.00              | 1.61              | -0.87             | 4.50              | 0.00              | 0.00              |
| 2QLZ                           | A     | LEU84  | PHE89  | 1.13              | 0.95              | 4.50              | 0.81              | 0.00              | 1.10              |                   |                   |
| 2QNR                           | B     | LEU257 | VAL262 | -0.01             | 1.30              | 0.54              | 2.19              | 0.00              | 4.50              |                   |                   |
| 3B7E                           | A     | ALA138 | HIS144 | 0.00              | 1.77              | 0.00              | 0.00              | 1.58              | 0.33              | 3.75              |                   |
| 3FSL                           | A     | ARG292 | SER296 | 4.50              | 0.59              | 1.59              | 0.30              | 1.16              |                   |                   |                   |
| 3GWA                           | A     | ASP92  | SER98  | 0.72              | 1.18              | -0.90             | 1.61              | 0.89              | 4.50              | 0.00              |                   |
| 3HMU                           | A     | THR90  | THR95  | -0.15             | 3.11              | 0.00              | 1.67              | 0.38              | 1.28              |                   |                   |
| 3OCD                           | A     | ARG238 | ALA244 | 1.64              | 0.00              | 0.00              | 1.93              | 0.43              | 3.83              | 0.00              |                   |
| 3STH                           | B     | MET305 | LYS312 | 0.00              | 1.56              | 0.00              | 0.00              | 0.00              | 2.13              | 0.00              | 4.50              |
| 3VTO                           | C     | HIS108 | ARG113 | 3.59              | 0.40              | 1.51              | 0.00              | 2.35              | 0.00              |                   |                   |
| 4EHI                           | A     | HIS361 | PHE366 | 1.44              | 0.79              | 1.44              | 0.00              | 0.00              | 2.45              |                   |                   |
| 4HST                           | B     | LEU37  | ASP43  | 1.33              | 0.00              | 4.50              | 0.27              | 1.04              | 0.00              | 0.00              |                   |



| Robetta Alanine Scan |       |        |        |                   |                   |                   |                   |                   |                   |                   |                   |
|----------------------|-------|--------|--------|-------------------|-------------------|-------------------|-------------------|-------------------|-------------------|-------------------|-------------------|
| PDB                  | CHAIN | FIRST  | LAST   | $\Delta\Delta G1$ | $\Delta\Delta G2$ | $\Delta\Delta G3$ | $\Delta\Delta G4$ | $\Delta\Delta G5$ | $\Delta\Delta G6$ | $\Delta\Delta G7$ | $\Delta\Delta G8$ |
| 1IAI                 | L     | HIS91  | PHE96  | 2.32              | 0.00              | 0.00              | 0.29              | 0.00              | 1.51              |                   |                   |
| 1J34                 | A     | GLU82  | SER87  | 0.00              | 5.39              | 0.53              | 1.43              | 0.00              | 0.50              |                   |                   |
| 1MTP                 | B     | ARG347 | LEU353 | 4.50              | 4.50              | 4.02              | 0.00              | 0.00              | 1.75              | 2.09              |                   |
| 1XIM                 | D     | SER106 | ARG112 | -0.02             | 2.61              | 0.29              | 4.18              | 0.55              | 0.34              | 4.50              |                   |
| 2DVT                 | A     | LEU182 | TRP187 | 2.07              | 0.00              | 0.00              | 0.00              | 1.56              | 4.50              |                   |                   |
| 2GE7                 | A     | PRO58  | CYS63  | 0.00              | 0.88              | 0.12              | 2.47              | 0.00              | -0.05             |                   |                   |
| 2IUF                 | E     | ALA33  | ALA38  | 0.00              | 0.00              | 2.21              | 3.43              | 0.00              | 0.00              |                   |                   |
| 2OIZ                 | D     | ARG147 | LEU154 | 2.62              | 0.00              | 0.00              | 4.50              | -0.26             | 2.46              | 0.00              | 0.00              |
| 2QLZ                 | A     | LEU84  | PHE89  | 2.43              | 1.37              | 0.00              | 0.56              | 0.00              | 2.39              |                   |                   |
| 2QNR                 | B     | LEU257 | VAL262 | 0.00              | 4.37              | 0.00              | 4.07              | 0.00              | 0.00              |                   |                   |
| 3B7E                 | A     | ALA138 | HIS144 | 0.00              | 1.60              | 0.00              | 0.00              | 0.75              | 1.77              | 3.19              |                   |
| 3FSL                 | A     | ARG292 | SER296 | 1.91              | 0.40              | 3.78              | 0.50              | 1.28              |                   |                   |                   |
| 3GWA                 | A     | ASP92  | SER98  | 0.90              | 2.64              | 1.27              | 3.31              | 0.00              | 3.49              | 0.00              |                   |
| 3HMU                 | A     | THR90  | THR95  | -0.23             | 2.23              | 2.76              | 1.16              | 0.48              | 3.01              |                   |                   |
| 3OCD                 | A     | ARG238 | ALA244 | 1.34              | 0.08              | 0.00              | 3.60              | 0.74              | 0.00              | 0.00              |                   |
| 3STH                 | B     | MET305 | LYS312 | 0.00              | 2.66              | 0.58              | 0.00              | 0.00              | 3.35              | 0.00              | 4.50              |
| 3VTO                 | C     | HIS108 | ARG113 | 1.79              | 0.19              | 2.04              | 0.00              | 1.89              | 0.00              |                   |                   |
| 4EHI                 | A     | HIS361 | PHE366 | 2.22              | 1.73              | 3.73              | 0.00              | 0.00              | 3.23              |                   |                   |
| 4HST                 | B     | LEU37  | ASP43  | 2.63              | 0.00              | -0.24             | 0.16              | 0.21              | 1.02              | 0.00              |                   |

**Supplementary Table 5. Comparison of LoopFinder results to HippDB results.** These show limited overlap between the two databases. Rows highlighted in light gray contain overlapping sequences, with boxed sequences highlighting specific overlapping sequences.

- A. PDB IDs for all of the protein complexes identified to have hot loops by LoopFinder and also have helical interface regions as identified by HippDB
- B. The interface chains involved in the PPI as identified by LoopFinder, the first letter listed is the chain that contains the interface loop
- C. Sequence of hot loop as identified by LoopFinder
- D. The interface chains involved in the PPI as identified by HippDB, the first letter listed is the chain that contains the interface helix (reference 10)
- E. Sequence of interface helix as identified by HippDB (reference 10)
- F. Identical to D, provided for interfaces with multiple interface helices (reference 10)
- G. Identical to E, provided for interfaces with multiple interface helices (reference 10)

| <b>A.<br/>PDB<br/>ID</b> | <b>B.<br/>Interface<br/>Chains</b> | <b>C.<br/>LoopFinder<br/>Hot Loops</b> | <b>D.<br/>Interface<br/>Chains</b> | <b>E.<br/>HippDB<br/>Interface Helices</b> | <b>F.<br/>Interface<br/>Chains</b> | <b>G.<br/>HippDB<br/>Interface Helices</b> |
|--------------------------|------------------------------------|----------------------------------------|------------------------------------|--------------------------------------------|------------------------------------|--------------------------------------------|
| 1BOU                     | DC                                 | DEGWG                                  | DA                                 | DLAWHIAQSLIL                               | DC                                 | IQYLRE                                     |
| 1CPC                     | AB                                 | ADSQGRFL                               | BA                                 | RMAACLRDMEIILRY<br>VTYAIFA                 | LK                                 | RMAACLRDMEIILRYVTYAI<br>FA                 |
| 1DD4                     | BA                                 | LTVSEL                                 | CA<br>DB                           | TIDEIIEAI<br>ELAELVKKLEDK                  | DB                                 | TIDEIIEAIE                                 |
| 1DOA                     | AB                                 | THHCP                                  | BA                                 | SLRKYKEALL                                 |                                    |                                            |
| 1XDT                     | RT                                 | HGERC                                  | BA                                 | LGRLLVV                                    | D C                                | LGRLLVV                                    |
| 1EEX                     | ML                                 | DYPLANK                                | BA                                 | ARPKYQAKSAILHIKET                          |                                    |                                            |
| 1EEX                     | AL                                 | QRDLKV                                 | BA                                 | ARPKYQAKSAILHIKET                          |                                    |                                            |
| 1EEX                     | LA                                 | AHGSKD                                 | BA                                 | ARPKYQAKSAILHIKET                          |                                    |                                            |
| 1EFR                     | AB                                 | HLGESTV                                | GE                                 | LTLTFNRTRQAVITKELIEIISGA                   |                                    |                                            |
| 1XEY                     | BA                                 | TIGSSEA                                | BA                                 | IILRYISYALLA                               | LK                                 | EILRYISYALLA                               |
| 1XFS                     | AB                                 | LVKNYRP                                | BA<br>DC                           | LGRLLVV<br>GRLLVV                          | BA                                 | FKLLGNVLVVVLARNF                           |
| 1GVN                     | BA                                 | YADDP                                  | DC                                 | NRLNDNLEE                                  | DC                                 | RYETMYAD                                   |
| 1H0H                     | D                                  | LEAEP                                  | BA                                 | GCQVACKQWH                                 |                                    |                                            |
| 1H2K                     | SA                                 | QGEEL                                  | SA                                 | EELLRAL                                    |                                    |                                            |

|      |    |          |     |                            |    |                               |
|------|----|----------|-----|----------------------------|----|-------------------------------|
| 1IWP | AG | FTDGDDT  | BA  | RPKFMAKAALFHIKE<br>TK      | ML | LEKVL                         |
|      |    |          | ML  | ERILAIYNAL                 | ML | FVRESAEVYQQ                   |
| 1IWP | AL | SHSDIRR  | BA  | RPKFMAKAALFHIKE<br>TK      | ML | LEKVL                         |
|      |    |          | ML  | ERILAIYNAL                 | ML | FVRESAEVYQQ                   |
| 1IWP | AL | QRDLMV   | BA  | RPKFMAKAALFHIKE<br>TK      | ML | LEKVL                         |
|      |    |          | ML  | ERILAIYNAL                 | ML | FVRESAEVYQQ                   |
| 1JNR | BA | GYVDYS   | CA  | VRLQKIMDEY                 |    |                               |
| 1KF6 | PO | SAIIA    | DC  | APVMILLVG                  |    |                               |
| 1KF6 | DC | ILLVG    | DC  | APVMILLVG                  |    |                               |
| 1LIA | LK | LDAFSR   | LK  | IILRYVSYALLA               |    |                               |
| 1LQB | CB | YTLKER   | CB  | LKERCLQVVRSL               |    |                               |
| 1LTS | ED | MAGKRE   | CA  | EETQNLSTIYLREYQS<br>KVKRQI | ED | KDTLRITYLT                    |
|      |    |          | FE  | KDTLRITYLT                 | GF | KDTLRITYLT                    |
|      |    |          | HG  | KDTLRITYLT                 |    |                               |
| 1M34 | JI | RDGFE    | DA  | KERGRLVDMMTDSHTWL          |    |                               |
| 1M34 | FE | VVCGGF   | DA  | KERGRLVDMMTDSHTWL          |    |                               |
| 1MXH | CA | VPLGQ    | FB  | LRKQR                      |    |                               |
| 1MHY | BD | RWHHPY   | GD  | GLRKER                     |    |                               |
| 1MHY | DG | WLIEP    | GD  | GLRKER                     |    |                               |
| 1MTY | BD | KFHGGRPS | HE  | LRKQR                      |    |                               |
| 1NVM | AC | VDRETL   | CA  | YTLMDAADD                  | GE | YTLMDAADD                     |
| 1P84 | CD | FVFYS    | BA  | YTKL                       | DC | RKRLGLKTVIILSSLYLLSIW<br>V... |
|      |    |          | GC  | ARAYRIIRAHQTELT            | HC | VLIPAGIYWYWWKNGNEY<br>NEFL    |
|      |    |          | FD  | EEFFHLQHYLDTAT             | GD | AYRIIRAHQTELT                 |
|      |    |          | ID  | DTAITSWYENH                | ID | WKDVK                         |
| 1POI | BA | PRSVGD   | DC  | LRFM                       |    |                               |
| 1PYA | EF | ETKNAYI  | CD  | DVLDGIVSYDRAET             | ED | DVLDGIVSYDRAET                |
| 1Q7L | BA | LLHDHDE  | D C | DNRYIRA                    | DC | EAVFLRGVDIYTRLLPALA           |
| 1QH8 | BA | NRHFKE   | DA  | ERGRLVDMMLDSHTWL           |    |                               |
| 1QHH | AB | AKNELL   | BA  | EKVVSVDVYQEYQQRL<br>L      | BA | DLIMTTIQLFDR                  |
|      |    |          | CB  | AGALAAFRSQLEQWT<br>QL      | CB | AQSRLLENLDEFLSVTKH            |
|      |    |          | CB  | LIAFLT                     |    |                               |
| 1QHH | BC | YDRKEI   | BA  | EKVVSVDVYQEYQQRL<br>L      | BA | DLIMTTIQLFDR                  |
|      |    |          | CB  | AGALAAFRSQLEQWT<br>QL      | CB | AQSRLLENLDEFLSVTKH            |

## Hot Loops at Protein-Protein Interfaces

## Gavenonis, Sheneman, Siegert, Eshelman, and Kritzer

|      |    |          |     |                         |    |                               |
|------|----|----------|-----|-------------------------|----|-------------------------------|
|      |    |          | CB  | LIAFLT                  |    |                               |
| 1QHH | BC | VIANP    | BA  | EKVVSVDVYQEYQQRL<br>L   | BA | DLIMTTIQLFDR                  |
|      |    |          | CB  | AGALAAFRSQLEQWT<br>QL   | CB | AQSRLNLDEFSLVTKH              |
|      |    |          | CB  | LIAFLT                  |    |                               |
| 1RM6 | CA | TQCGFCT  | BA  | WWRSG                   |    |                               |
| 1RP3 | AB | QLIFY    | DC  | TLSKIAQELS              | DC | DEKVVKGLIEFF                  |
|      |    |          | FE  | DKVTLSKIAQEL            | FE | DEKVVKGLIEFF                  |
|      |    |          | HG  | LSKIAQEL                | HG | EKKVKELKEKIE                  |
|      |    |          | HG  | DEKVVKGLIEFF            |    |                               |
| 1S5D | ED | LAGKRE   | ED  | KDTRLRIAYLT             | HD | IERMKDTLRIAYLT                |
|      |    |          | FE  | DTLRIAYL                |    |                               |
| 1SDK | BA | AHHFGKEF | D C | LGRLLVV                 |    |                               |
| 1TQY | BA | LWSEG    | DC  | FTHREFRKLWS             | FE | FTHREFRKLWS                   |
| 1TWF | AH | LTLRDT   | KC  | HTLGNLIRAE              | KC | ALKNACNSIINKLGALKTNF<br>ETE   |
| 1TZY | FE | KQVHP    | BA  | IYVYKVLKQV              | BA | KAMGIMNSFVNDIFERIAGE<br>AS... |
|      |    |          | BA  | ELAKHAVSEGTKAVT<br>KYTS | DB | VTYTEH                        |
|      |    |          | DC  | PAIRRLARR               | DC | EETRGVLKVFLENVIRDAVT<br>YTE   |
|      |    |          | GC  | DIQLARRIR               | HF | VTYTEH                        |
|      |    |          | HG  | PAIRRLARR               | HG | ETRGVLKVFLENVIRDAVT<br>YTE    |
| 1ULI | CE | QCRHRG   | DC  | QMMRGRLRKI              | EC | DGENWVEIQQV                   |
|      |    |          | FD  | QHEIEQFYWEAKLLN         |    |                               |
| 1ULI | CE | EEQAF    | DC  | QMMRGRLRKI              | EC | DGENWVEIQQV                   |
|      |    |          | FD  | QHEIEQFYWEAKLLN         |    |                               |
| 1UMD | BC | GGHHH    | CA  | GDWYAGINFAAV            | CB | LRQEALL                       |
|      |    |          | DC  | LRYR                    |    |                               |
| 1UMD | AC | AHAFGI   | CA  | GDWYAGINFAAV            | CB | LRQEALL                       |
|      |    |          | DC  | LRYR                    |    |                               |
| 1YE9 | AE | YTEEGI   | DA  | LREKITHFD               | HA | PLLQGRFLFSYTD                 |
|      |    |          | FC  | PLLQGRFLFSYTD<br>R      | ED | PLLQGRFLFSYTD                 |
|      |    |          | GE  | FFAE                    | HF | FFAE                          |
|      |    |          | LI  | REKITHFD                | KJ | REKITHFD                      |
|      |    |          | OJ  | PLLQGRFLFSYTD           | NK | ELWEAIE                       |
| 1YFN | EA | QKMPFW   | BA  | RPYLLRAFYEWL            | DC | PYLLRAFYEWLLD                 |
| 1YWH | FE | YLWSS    | DC  | YLWS                    | HG | YLWS                          |
|      |    |          | NM  | YLWS                    | PO | YLWS                          |
| 1Z3E | BA | LKRAGI   | BA  | VRSYNCLKR               |    |                               |
| 2A6H | ED | VDSKYRL  | BA  | TLGNPLRRILLS            | LK | TLGNPLRRILLS                  |

|      |    |          |     |                                |    |                               |
|------|----|----------|-----|--------------------------------|----|-------------------------------|
| 2AFH | AF | DIVFGG   | DA  | KERGLVDMMTDSHTWL               |    |                               |
| 2AFH | CD | FQKMG    | DA  | KERGLVDMMTDSHTWL               |    |                               |
| 2B1X | AE | YISEDQ   | BA  | DSMEMRVLRL                     | FB | WLYMEAELLD                    |
| 2B1X | AE | ACRHRG   | BA  | DSMEMRVLRL                     | FB | WLYMEAELLD                    |
| 2B7Y | CD | WASETGN  | D C | LKDV                           |    |                               |
| 2BR2 | EB | DYAKKADG | DC  | RREIELSKVIREALE                | LK | RREIELSKVIREALE               |
|      |    |          | PO  | RREIELSKVIREALE                | WX | RREIELSKVIREALE               |
| 2BW3 | BA | VVRDCR   | BA  | DCKKEAIEKCAQWVVRD              |    |                               |
| 2BWE | CD | LRRSGG   | BA  | EHQLRQLND                      | CB | EHQLRQLND                     |
|      |    |          | DC  | EHQLRQLND                      | ED | EHQLRQLND                     |
|      |    |          | FE  | EHQLRQLN                       | HG | EHQLRQLN                      |
|      |    |          | IH  | EHQLRQLND                      | KJ | EHQLRQLND                     |
|      |    |          | ML  | EHQLRQLND                      | ON | EHQLRQLN                      |
|      |    |          | QP  | EHQLRQLND                      | RQ | EHQLRQLND                     |
| 2FM8 | AC | DLFALPS  | BA  | YEILMTI                        | CB | PALIKQASLDALF                 |
| 2G38 | AB | AADLVS   | BA  | AAARAWRSLDVEMT<br>AVQRSFNRTL   | DC | AAARAWRSLDVEMTAVQR<br>SFNRTL  |
| 2GL9 | CD | STWNFG   | DB  | HLVVELMN                       |    |                               |
| 2H5K | BA | RDGAGKY  | BA  | NELVDY                         |    |                               |
| 2HZS | AB | VFNGSSTG | IB  | VDDVLKFTFT                     | JD | VDDVLKFTFT                    |
|      |    |          | KF  | VDDVLKFTFT                     | LH | VDDVLKFTFT                    |
| 2J3T | DC | ETDTFK   | DC  | LASMFHSLFAIGSQ                 |    |                               |
| 2JDI | HG | ASPTQV   | IH  | YIRYSQICAKAVR                  |    |                               |
| 2P5T | AB | LNPVED   | CA  | ERYSGYLDGIERMLEI<br>SEKR       | DC | HALARNLRSLT                   |
|      |    |          | HD  | SYLSTLIRYE                     |    |                               |
| 2XPP | BA | FEIFG    | BA  | GDRDSLFFEIF                    |    |                               |
| 2QRD | GA | DGETGS   | DC  | AFLT                           |    |                               |
| 2RF4 | AB | IHDAF    | BA  | LSSISQLKRIQRDF                 | DC | LSSISQLKRIQRDF                |
| 2V7Q | FC | HLGESTV  | JD  | FGKREQAEEERYFRA<br>RAKEQLA...  | IH | YIRYSQICAKAVR                 |
| 2V7Q | AD | SLLLRR   | JD  | FGKREQAEEERYFRA<br>RAKEQLA...  | IH | YIRYSQICAKAVR                 |
| 2VX8 | AB | KSLLG    | BA  | KFLM                           |    |                               |
| 2WG3 | AC | ESRNHV   | DB  | LDDMEE                         |    |                               |
| 2WNR | BE | FSVEER   | FE  | SVEISKITAEAL                   |    |                               |
| 2YEV | AB | LSMTPLD  | BA  | RLEVWVTLIPLAIVFV<br>LFLGLTA... | CA | GAALVTLFFYLIL                 |
|      |    |          | CA  | DLRFVLFMLLLILLAA<br>GTVALM...  | ED | RLEVWVTLIPLAIVFVLFGL<br>TA... |
| 2YFI | EA | CRHRGMRI | FD  | QNEIEQFYRYEAQLLD               | HG | ETMYGRIRKV                    |
|      |    |          | LH  | QNEIEQFYRYEAQLLD               |    |                               |

|      |    |          |    |                               |    |                               |
|------|----|----------|----|-------------------------------|----|-------------------------------|
| 2YIU | FA | CTHLG    | BA | MDRKQVGFVSVIFLIV<br>LAALLY... | DA | WLHRR                         |
|      |    |          | DA | EVTWIV                        | ED | MDRKQVGFVSVIFLIVLAAL<br>LY... |
| 2Z5C | CA | NLYYD    | CB | AVTHNLYY                      | FE | AVTHNLYY                      |
| 2ZC3 | AB | YDRNGV   | CB | PGDLAEELRR                    | FE | PGDLAEELRR                    |
| 3A1G | AB | EKFFP    | DC | ERIKELRNL                     |    |                               |
| 3AJV | CB | VDRTGL   | CB | WAAAVEVIAG                    | DB | EIVRAGRL                      |
| 3AYX | AB | KNPHP    | DB | FDEAISE                       | DC | YMAKLAEQA                     |
|      |    |          | IG | FDEAIS                        | JH | FDEAISE                       |
|      |    |          | JI | VYMAKLAEQ                     |    |                               |
| 3CF4 | AG | AETWQEA  | GA | KFYINQVLSAAKNF                |    |                               |
| 3CIP | AG | ASLSTF   | GA | QDESGAAIFTVQLDDY              |    |                               |
| 3CR3 | CD | SHSPEIA  | DC | EIASGLKCLR                    |    |                               |
| 3DD7 | AB | ISRYG    | BA | EFASLFDT                      | DC | AEFASLFDT                     |
| 3DWL | DA | TDFDGVTF | FD | NGRARLVAETYLSC                | KI | ILVRKFMQFL                    |
|      |    |          | KI | IEFMEEVDAEISEMK               | KI | NGRARLVAETYLS                 |
| 3EXE | BA | YYMSGG   | BA | TYYM                          | CA | GQIFEAYNMAAL                  |
|      |    |          | DB | VGAEICARIME                   | DC | TYYM                          |
|      |    |          | GE | GQIFEAYNMAALW                 | HF | VGAEICARIME                   |
| 3EUH | AB | DYYIR    | BA | PELVAWARK                     | BA | RLSFLAVATLNG                  |
|      |    |          | BA | LGIGITDYI                     | BA | EGGDEFHWHRNVYAPLKY            |
| 3FXD | BA | YSEII    | BA | NTDAVEVLTELNTKV<br>ERA        | DC | DNTDAVEVLTELNTKVERA<br>A      |
| 3G5O | AB | RAEFGV   | BA | LAAVVEFA                      | DA | WESLQETLYWL                   |
|      |    |          | DC | RESIAEADADIAS                 | DC | EIRAEF                        |
| 3H0L | BC | HEGDKT   | CA | FQKQLSDILDF                   | FD | FQKQLSDILDF                   |
|      |    |          | IG | FQKQLSDILDF                   | LJ | FQKQLSDILDF                   |
|      |    |          | OM | FQKQLSDILDF                   | RP | FQKQLSDILDF                   |
|      |    |          | US | FQKQLSDILDF                   | V  | FQKQLSDILDF                   |
| 3HVQ | AC | RIYGFY   | CA | ASAEELE                       |    |                               |
| 3IAM | EG | FREGRY   | 43 | MEAVIYHFKH                    | DC | MEAVIYHFKH                    |
| 3K6G | AD | FLKNSG   | DA | TLKAAFCTL                     | DA | AFAKLDQ                       |
|      |    |          | EB | TLKAAFCTL                     | EB | AFAKLDQ                       |
|      |    |          | FC | TLKAAFCTL                     | FC | FAKLDQ                        |
| 3MM5 | ED | QGWIHC   | EA | WERFFE                        |    |                               |
| 3MM5 | VA | EPPRW    | EA | WERFFE                        |    |                               |
| 3O4X | EH | GDYFVF   | DA | FFDLKGRLLDIRME                | DA | EVFQILNTV                     |
|      |    |          | DA | EPHFLSILQHL                   | DA | ARPQYYKLIECVSQIV              |
|      |    |          | HE | FWTK                          |    |                               |

| 3OQY | Bb | ERQHM        | Aa  | AAKERQH                        | bB | AAKERQH                        |
|------|----|--------------|-----|--------------------------------|----|--------------------------------|
| 3P8C | BA | LGPYG        | EA  | ITSSIKKIADFLNSFDM<br>SCRSR...  | ED | SSIKKIADFLNSFDMSCRSRL<br>A...  |
| 3P8C | BA | SYHIP        | EA  | ITSSIKKIADFLNSFDM<br>SCRSR...  | ED | SSIKKIADFLNSFDMSCRSRL<br>A...  |
| 3RRL | DC | INAGKET      | D C | DLVHG                          |    |                                |
| 3RRR | AB | FYQSTCS      | BA  | IVNKQSCSISNIETVIEF<br>QQK      | FB | LHLEGEV NKIKSALLSTNKA<br>VV... |
|      |    |              | FD  | LHLEGEV NKIKSALLS<br>TNKAVV... | FD | SQVNEKINQSLAFIRKSDEL           |
|      |    |              | HG  | VNKQSCSISNIETVIEF<br>QQK       | LH | LEGEV NKIKSALLSTNKAVV<br>SL... |
|      |    |              | NH  | VSKVLHLEGEV                    | NH | IKSALLSTNKAVVSLSNGVS<br>VL...  |
| 3SDE | AB | CGDGAF       | BA  | TLAEIAKVE                      | BA | RWKALIEMEKQQDQVDR<br>NIKE...   |
| 3SQG | AD | GHYGREP      | FE  | SMDVTAQIHWKRSVGGF              |    |                                |
| 3U52 | BD | YLTRD        | DC  | MQESAETSFGECEKR                |    |                                |
| 3UQY | MT | LGIFR        | SM  | MSAIITYMVTf                    |    |                                |
| 3UQY | SL | VQSWDDD<br>A | SM  | MSAIITYMVTf                    |    |                                |
| 3UQY | LS | GGKNPHPN     | SM  | MSAIITYMVTf                    |    |                                |
| 3ZWL | BE | HKIFEE       | EV  | RELLKQWTEYREKIG<br>QEMEKS      | FD | RELLKQWTEYREKIGQEME<br>KSM     |
| 4F4O | FD | SCRTA        | BA  | LGRLLVV                        | BA | RLGNVIVVVLARRL                 |
|      |    |              | ED  | LGRLLVV                        | ED | LLGNVIVVVLARRL                 |
|      |    |              | HG  | LGRLLVV                        | HG | LLGNVIVVVLARRL                 |
|      |    |              | KJ  | LGRLLVV                        |    |                                |
| 4F6R | BC | KGHYT        | BA  | LRKLAVNM                       | CB | AMLERLQEKDKHAEVVRK<br>NK       |
| 4FIP | HA | LKKYF        | DA  | AIVDHL                         | ED | YFIRHSM                        |
| 4GD3 | SL | VQSWDDD<br>A | SM  | SAIITYMVTf                     |    |                                |
| 4GD3 | LS | GGKNPHPN     | SM  | SAIITYMVTf                     |    |                                |
| 4GD3 | TM | CIQSGH       | SM  | SAIITYMVTf                     |    |                                |
| 4GDK | CB | DRLQR        | CB  | RWKRHISEQLRRRD                 | CB | FEEIILQYN                      |
|      |    |              | FE  | WKRHISEQLRRRDRL                | FE | AFEEIILQYN                     |
| 4GDL | CB | DRLQR        | CB  | WKRHISEQLRRRDRL                | CB | QAFEEIILQYN                    |

**Supplementary Table 6. Analysis of all interface loops and the hot loop set with respect to protein function.** Annotated function for each protein-protein interaction was identified for the total PDB input set of proteins, the total interface loop set of proteins, and the hot loop set of proteins. Only oxidoreductase and lyase enzymes seemed to be more highly represented in the final hot loop data set of proteins compared to the input and total interface loop set. Only categories that had at least one protein of that function in the hot loop dataset are shown and tallied.

- A. Functional categories contained in the dataset.
- B. Number of each category of protein in the total PDB
- C. Number of each category of protein in the total interface loop dataset
- D. Number of each category of protein in the hot loop dataset
- E.  $\frac{\text{Number from B.}}{96,692 \text{ (total number of proteins in the PDB)}} \times 100$
- F.  $\frac{\text{Number from C.}}{25,005 \text{ (proteins in the total interface loop set)}} \times 100$
- G.  $\frac{\text{Number from D.}}{1,407 \text{ (proteins in the hot loop set)}} \times 100$

| A.<br>CATEGORY                | B.<br># in<br>PDB | C.<br># in total<br>loop set | D.<br># in hot<br>loop set | E.<br>% of<br>PDB | F.<br>% of total<br>loop set | G.<br>% of hot<br>loop set |
|-------------------------------|-------------------|------------------------------|----------------------------|-------------------|------------------------------|----------------------------|
| OXIDOREDUCTASE                | 8786              | 3980                         | 287                        | 9.09              | 15.92                        | 20.40                      |
| LYASE                         | 3324              | 1926                         | 115                        | 3.44              | 7.70                         | 8.17                       |
| HYDROLASES                    | 16320             | 3088                         | 178                        | 16.88             | 12.35                        | 12.65                      |
| ISOMERASE                     | 2026              | 1070                         | 71                         | 2.10              | 4.28                         | 5.05                       |
| STRUCTURAL GENOMICS           | 2494              | 1140                         | 71                         | 2.58              | 4.56                         | 5.05                       |
| TRANSFERASE                   | 12032             | 3611                         | 198                        | 12.44             | 14.44                        | 14.07                      |
| IMMUNE SYSTEM                 | 2515              | 716                          | 20                         | 2.60              | 2.86                         | 1.42                       |
| TRANSPORT PROTEIN             | 2040              | 311                          | 10                         | 2.11              | 1.24                         | 0.71                       |
| TRANSFERASE/INHIBITOR         | 1403              | 83                           | 4                          | 1.45              | 0.33                         | 0.28                       |
| HYDROLASE/HYDROLASE INHIBITOR | 2233              | 344                          | 15                         | 2.31              | 1.38                         | 1.07                       |
| LIGASE                        | 1551              | 662                          | 26                         | 1.60              | 2.65                         | 1.85                       |
| RNA                           | 946               | 4                            | 1                          | 0.98              | 0.02                         | 0.07                       |
| TRANSCRIPTION                 | 2779              | 697                          | 29                         | 2.87              | 2.79                         | 2.06                       |



|                                   |      |     |    |      |      |      |
|-----------------------------------|------|-----|----|------|------|------|
| RIBOSOME                          | 716  | 8   | 1  | 0.74 | 0.03 | 0.07 |
| SIGNALING PROTEIN                 | 2096 | 353 | 25 | 2.17 | 1.41 | 1.78 |
| ELECTRON TRANSPORT                | 1144 | 144 | 7  | 1.18 | 0.58 | 0.50 |
| MEMBRANE PROTEIN                  | 1243 | 253 | 8  | 1.29 | 1.01 | 0.57 |
| CHAPERONE                         | 955  | 247 | 6  | 0.99 | 0.99 | 0.43 |
| DNA BINDING PROTEIN               | 1261 | 340 | 11 | 1.30 | 1.36 | 0.78 |
| TOXIN                             | 890  | 184 | 18 | 0.92 | 0.74 | 1.28 |
| FLAVOPROTEIN                      | 89   | 25  | 8  | 0.09 | 0.10 | 0.57 |
| METAL BINDING PROTEIN             | 1044 | 153 | 13 | 1.08 | 0.61 | 0.92 |
| RNA BINDING PROTEIN               | 807  | 115 | 6  | 0.83 | 0.46 | 0.43 |
| CELL ADHESION                     | 915  | 189 | 7  | 0.95 | 0.76 | 0.50 |
| CELL CYCLE                        | 554  | 222 | 14 | 0.57 | 0.89 | 1.00 |
| SUGAR BINDING PROTEIN             | 887  | 166 | 7  | 0.92 | 0.66 | 0.50 |
| VIRAL PROTEIN                     | 1984 | 421 | 24 | 2.05 | 1.68 | 1.71 |
| OXIDOREDUCTASE/INHIBITOR          | 432  | 34  | 1  | 0.45 | 0.14 | 0.07 |
| TRANSCRIPTION REGULATOR           | 405  | 165 | 4  | 0.42 | 0.66 | 0.28 |
| PROTEIN BINDING                   | 1249 | 263 | 20 | 1.29 | 1.05 | 1.42 |
| APOPTOSIS                         | 399  | 37  | 1  | 0.41 | 0.15 | 0.07 |
| UNKNOWN FUNCTION                  | 873  | 245 | 17 | 0.90 | 0.98 | 1.21 |
| DE NOVO PROTEIN                   | 342  | 23  | 1  | 0.35 | 0.09 | 0.07 |
| ION TRANSPORT                     | 16   | 11  | 4  | 0.02 | 0.04 | 0.28 |
| BIOSYNTHETIC PROTEIN              | 339  | 136 | 9  | 0.35 | 0.54 | 0.64 |
| ALLERGEN                          | 112  | 29  | 5  | 0.12 | 0.12 | 0.36 |
| HORMONE                           | 371  | 31  | 3  | 0.38 | 0.12 | 0.21 |
| OXIDOREDUCTASE/ELECTRON TRANSPORT | 53   | 59  | 4  | 0.05 | 0.24 | 0.28 |
| OXYGEN TRANSPORT                  | 353  | 38  | 5  | 0.37 | 0.15 | 0.36 |
| HORMONE/GROWTH FACTOR             | 270  | 23  | 1  | 0.28 | 0.09 | 0.07 |
| SERINE PROTEASE                   | 132  | 15  | 4  | 0.14 | 0.06 | 0.28 |
| PROTEIN TRANSPORT                 | 649  | 175 | 7  | 0.67 | 0.70 | 0.50 |
| IMMUNOGLOBULIN                    | 179  | 39  | 5  | 0.19 | 0.16 | 0.36 |
| ANTIBIOTIC RESISTANCE             | 22   | 13  | 3  | 0.02 | 0.05 | 0.21 |
| LIPID BINDING PROTEIN             | 356  | 45  | 3  | 0.37 | 0.18 | 0.21 |
| STRUCTURAL PROTEIN                | 995  | 208 | 13 | 1.03 | 0.83 | 0.92 |
| METAL TRANSPORT                   | 378  | 62  | 3  | 0.39 | 0.25 | 0.21 |
| LUMINESCENT PROTEIN               | 221  | 22  | 1  | 0.23 | 0.09 | 0.07 |
| GENE REGULATION                   | 410  | 67  | 4  | 0.42 | 0.27 | 0.28 |
| TRANSPORT                         | 69   | 15  | 3  | 0.07 | 0.06 | 0.21 |
| VIRAL PROTEIN/DE NOVO PROTEIN     | 2    | 4   | 2  | 0.00 | 0.02 | 0.14 |
| LIGHT HARVESTING PROTEIN          | 3    | 6   | 2  | 0.00 | 0.02 | 0.14 |
| PHOTOSYNTHESIS                    | 204  | 90  | 4  | 0.21 | 0.36 | 0.28 |
| KETOLISOMERASE                    | 3    | 21  | 2  | 0.00 | 0.08 | 0.14 |
| DEHYDROGENASE                     | 16   | 8   | 2  | 0.02 | 0.03 | 0.14 |

|                                     |     |    |   |      |      |      |
|-------------------------------------|-----|----|---|------|------|------|
| PENICILLIN BINDING PROTEIN          | 14  | 11 | 2 | 0.01 | 0.04 | 0.14 |
| CALCIUM BINDING PROTEIN             | 164 | 11 | 1 | 0.17 | 0.04 | 0.07 |
| HEME BINDING PROTEIN                | 30  | 19 | 2 | 0.03 | 0.08 | 0.14 |
| PLANT PROTEIN                       | 252 | 65 | 5 | 0.26 | 0.26 | 0.36 |
| LIGASE/INHIBITOR                    | 79  | 9  | 2 | 0.08 | 0.04 | 0.14 |
| NEUROPEPTIDE                        | 57  | 15 | 2 | 0.06 | 0.06 | 0.14 |
| TRANSLATION                         | 338 | 92 | 4 | 0.35 | 0.37 | 0.28 |
| BIOTIN BINDING PROTEIN              | 144 | 19 | 1 | 0.15 | 0.08 | 0.07 |
| HORMONE RECEPTOR                    | 115 | 8  | 1 | 0.12 | 0.03 | 0.07 |
| NUCLEAR PROTEIN                     | 95  | 14 | 2 | 0.10 | 0.06 | 0.14 |
| LECTIN                              | 166 | 32 | 3 | 0.17 | 0.13 | 0.21 |
| TRANSFERASE/HYDROLASE               | 16  | 25 | 1 | 0.02 | 0.10 | 0.07 |
| REPLICATION                         | 210 | 72 | 3 | 0.22 | 0.29 | 0.21 |
| MONOOXYGENASE                       | 6   | 21 | 1 | 0.01 | 0.08 | 0.07 |
| OXIDOREDUCTASE/IMMUNE SYSTEM        | 8   | 21 | 1 | 0.01 | 0.08 | 0.07 |
| BACTERIAL ANTIBIOTIC RESISTANCE     | 1   | 1  | 1 | 0.00 | 0.00 | 0.07 |
| ADP-RIBOSYLATION                    | 2   | 1  | 1 | 0.00 | 0.00 | 0.07 |
| RECEPTOR                            | 120 | 12 | 1 | 0.12 | 0.05 | 0.07 |
| ENDOCYTOSIS                         | 69  | 20 | 2 | 0.07 | 0.08 | 0.14 |
| IMMUNE SYSTEM/ANTIMICROBIAL PROTEIN | 1   | 2  | 1 | 0.00 | 0.01 | 0.07 |
| MEMBRANE PROTEIN/CELL ADHESION      | 1   | 2  | 1 | 0.00 | 0.01 | 0.07 |
| POSTSEGREGATIONAL KILLING SYSTEM    | 1   | 2  | 1 | 0.00 | 0.01 | 0.07 |
| TRYPTOPHAN BIOSYNTHESIS             | 1   | 2  | 1 | 0.00 | 0.01 | 0.07 |
| VIRAL PROTEIN/PROTEIN BINDING       | 5   | 1  | 1 | 0.01 | 0.00 | 0.07 |
| NITRITE REDUCTASE                   | 1   | 3  | 1 | 0.00 | 0.01 | 0.07 |
| VIRAL PROTEIN/SIGNALING PROTEIN     | 4   | 2  | 1 | 0.00 | 0.01 | 0.07 |
| PROTEIN TURNOVER                    | 3   | 16 | 1 | 0.00 | 0.06 | 0.07 |
| MEMBRANE PROTEIN/OXIDOREDUCTASE     | 2   | 3  | 1 | 0.00 | 0.01 | 0.07 |
| PROTEIN BINDING/BLOOD CLOTTING      | 2   | 3  | 1 | 0.00 | 0.01 | 0.07 |
| PROTEIN SYNTHESIS/TRANSFERASE       | 2   | 3  | 1 | 0.00 | 0.01 | 0.07 |
| PROTEIN TRANSPORT/IMMUNE SYSTEM     | 2   | 3  | 1 | 0.00 | 0.01 | 0.07 |
| IMMUNE SYSTEM/CYTOKINE              | 9   | 1  | 1 | 0.01 | 0.00 | 0.07 |
| MEMBRANE TRANSPORT                  | 3   | 3  | 1 | 0.00 | 0.01 | 0.07 |
| MOLYBDENUM-IRON PROTEIN             | 1   | 4  | 1 | 0.00 | 0.02 | 0.07 |
| STRUCTURAL PROTEIN/CHAPERONE        | 4   | 3  | 1 | 0.00 | 0.01 | 0.07 |
| DOMAIN SWAPPING                     | 2   | 4  | 1 | 0.00 | 0.02 | 0.07 |
| RECOMBINATION                       | 128 | 34 | 1 | 0.13 | 0.14 | 0.07 |
| COMPLEMENT REGULATOR                | 5   | 3  | 1 | 0.01 | 0.01 | 0.07 |
| IMMUNOLOGY                          | 1   | 5  | 1 | 0.00 | 0.02 | 0.07 |
| PROTEIN BIOSYNTHESIS                | 1   | 5  | 1 | 0.00 | 0.02 | 0.07 |
| HALOPEROXIDASE                      | 14  | 1  | 1 | 0.01 | 0.00 | 0.07 |
| ADENOVIRUS                          | 2   | 5  | 1 | 0.00 | 0.02 | 0.07 |

|                                          |     |    |   |      |      |      |
|------------------------------------------|-----|----|---|------|------|------|
| PORIN                                    | 10  | 2  | 1 | 0.01 | 0.01 | 0.07 |
| IMMUNE SYSTEM/HORMONE RECEPTOR           | 1   | 6  | 1 | 0.00 | 0.02 | 0.07 |
| OXYGENASE                                | 5   | 4  | 1 | 0.01 | 0.02 | 0.07 |
| RIBOSOME INHIBITOR                       | 5   | 4  | 1 | 0.01 | 0.02 | 0.07 |
| TRANSFERASE/RNA BINDING PROTEIN          | 5   | 4  | 1 | 0.01 | 0.02 | 0.07 |
| OXYGEN TRANSPORT/TRANSPORT PROTEIN       | 1   | 7  | 1 | 0.00 | 0.03 | 0.07 |
| CARBOXY-LYASE                            | 2   | 6  | 1 | 0.00 | 0.02 | 0.07 |
| TRANSCRIPTION REGULATION                 | 124 | 16 | 1 | 0.13 | 0.06 | 0.07 |
| ANTITOXIN                                | 4   | 5  | 1 | 0.00 | 0.02 | 0.07 |
| DNA RECOMBINATION                        | 6   | 4  | 1 | 0.01 | 0.02 | 0.07 |
| FORMYLTRANSFERASE                        | 2   | 7  | 1 | 0.00 | 0.03 | 0.07 |
| OXIDOREDUCTASE/OXIDOREDUCTASE            | 2   | 11 | 1 | 0.00 | 0.04 | 0.07 |
| HYDROLASE/REPLICATION                    | 3   | 7  | 1 | 0.00 | 0.03 | 0.07 |
| LYASE/OXIDOREDUCTASE                     | 3   | 11 | 1 | 0.00 | 0.04 | 0.07 |
| TRANSFERASE/RECEPTOR                     | 7   | 5  | 1 | 0.01 | 0.02 | 0.07 |
| TRANSCRIPTION/HYDROLASE                  | 4   | 10 | 1 | 0.00 | 0.04 | 0.07 |
| HYDROLASE/TRANSFERASE                    | 18  | 20 | 1 | 0.02 | 0.08 | 0.07 |
| ACETYLCHOLINE-BINDING<br>PROTEIN/AGONIST | 17  | 3  | 1 | 0.02 | 0.01 | 0.07 |
| TOXIN/ANTITOXIN                          | 7   | 9  | 1 | 0.01 | 0.04 | 0.07 |
| OXIDOREDUCTASE/PROTEIN BINDING           | 8   | 9  | 1 | 0.01 | 0.04 | 0.07 |
| GLYCOGEN PHOSPHORYLASE                   | 18  | 4  | 1 | 0.02 | 0.02 | 0.07 |
| SIGNALING PROTEIN/PROTEIN BINDING        | 19  | 4  | 1 | 0.02 | 0.02 | 0.07 |
| TRANSCRIPTION/ACTIVATOR                  | 12  | 7  | 1 | 0.01 | 0.03 | 0.07 |
| HYDROLASE/HYDROLASE REGULATOR            | 11  | 8  | 1 | 0.01 | 0.03 | 0.07 |
| ENDOCYTOSIS/EXOCYTOSIS                   | 101 | 12 | 1 | 0.10 | 0.05 | 0.07 |
| DIOXYGENASE                              | 18  | 13 | 1 | 0.02 | 0.05 | 0.07 |
| CELL INVASION                            | 79  | 30 | 1 | 0.08 | 0.12 | 0.07 |
| COAGULATION                              | 22  | 8  | 1 | 0.02 | 0.03 | 0.07 |
| ANTITUMOR PROTEIN                        | 47  | 5  | 1 | 0.05 | 0.02 | 0.07 |
| TRANSCRIPTION REPRESSOR                  | 25  | 8  | 1 | 0.03 | 0.03 | 0.07 |
| KINASE                                   | 65  | 7  | 1 | 0.07 | 0.03 | 0.07 |
| VIRAL PROTEIN/IMMUNE SYSTEM              | 102 | 29 | 1 | 0.11 | 0.12 | 0.07 |
| CIRCADIAN CLOCK PROTEIN                  | 38  | 20 | 1 | 0.04 | 0.08 | 0.07 |
| GROWTH FACTOR                            | 93  | 16 | 1 | 0.10 | 0.06 | 0.07 |
| TRANSCRIPTION ACTIVATOR                  | 49  | 11 | 1 | 0.05 | 0.04 | 0.07 |

**Supplementary Information References:**

- (1) Kortemme, T.; Baker, D. *Proc. Natl. Acad. Sci.* **2002**, *99*, 14116–14121.
- (2) Fersht, A. R.; Shi, J.-P.; Knill-Jones, J.; Lowe, D. M.; Wilkinson, A. J.; Blow, D. M.; Brick, P.; Carter, P.; Waye, M. M. Y.; Winter, G. *Nature* **1985**, *314*, 235–238.
- (3) Golovin, A.; Henrick, K. *BMC Bioinformatics* **2008**, *9*, 312.
- (4) Janin, J.; Miller, S.; Chothia, C. *J. Mol. Biol.* **1988**, *204*, 155–164.
- (5) Cunningham, B.; Wells, J. *Science* **1989**, *244*, 1081–1085.
- (6) Clackson, T.; Wells, J. *Science* **1995**, *267*, 383–386.
- (7) Cunningham, B. C.; Wells, J. A. *J. Mol. Biol.* **1993**, *234*, 554–563.
- (8) Huang, J.; Wan, B.; Wu, L.; Yang, Y.; Dou, Y.; Lei, M. *Cell Res* **2012**, *22*, 1078–1081.
- (9) DeLano, W. L. *The PyMol Molecular Graphic System*; DeLano Scientific LLC: San Francisco, CA.
- (10) Bergey, C. M.; Watkins, A. M.; Arora, P. S. *Bioinformatics* **2013**, *29*, 2806–2807.
- (11) Kortemme, T.; Kim, D.; Baker, D. *Sci. STKE Signal Transduct. Knowl. Environ.* **2004**, *2004*, pl2.

**Supplementary Data Set 1. The entire set of hot loops generated by LoopFinder.** These are those loops that meet the requirements previously discussed and outlined in the methods description.

- A. PDB ID numbers for each protein complex identified to have a hot loop at the interface
- B. Structure title
- C. Functional category of the protein that takes part in the interaction
- D. The chain on which the hot loop is located
- E. The partner that binds to the exposed hot loop
- F. The length of the sequence identified as a hot loop, in number of amino acids
- G. The number of the first residue in the hot loop
- H. The number of the last residue in the hot loop
- I. Linker length, the distance between the N and C terminus of the hot loop peptide, in Angstroms
- J. The sequence of the hot loop
- K. The calculated  $\Delta\Delta G_{\text{residue}}$  as calculated using computation alanine methods developed by Kortemme et al. (reference 11)
- L. The average energy of the loop,  $\Delta\Delta G_{\text{loop,avg}}$  is the average of all values from column K.
- M. The sum of all  $\Delta\Delta G_{\text{residue}}$  values from column K. (reference 11)
- N. The hot loops percent contribution to the total interface energy
- O. Comments: (\*) denotes that the  $\Delta\Delta G_{\text{loop,sum}}$  calculated for the hot loop is a negative value. Negative values denote the possibility that substitution of alanine may improve binding, as in the prevention of an optimal, buried hydrogen bond (as described in reference 1). (+) denotes that the calculated total interface energy is a negative value.
- P. Loop types for as identified using PDBeMotif (reference 3)

**Supplementary Data Set 2. The subset of 364 hot loops that do not contain two or more consecutive hot spots.** These loops were the main focus for identifying biologically relevant protein complexes that may be best targeted using constrained macrocycles.

- A. PDB ID numbers for each protein complex identified to have a hot loop at the interface
- B. Structure title
- C. Functional category of the protein that takes part in the interaction
- D. The chain on which the hot loop is located
- E. The partner that binds to the exposed hot loop
- F. The length of the sequence identified as a hot loop, in number of amino acids
- G. The number of the first residue in the hot loop
- H. The number of the last residue in the hot loop
- I. The sequence of the hot loop
- J. The calculated  $\Delta\Delta G_{\text{loop}}$  as calculated using computation alanine methods developed by Kortemme et al. (reference 11)
- K. Number of hot spots located within the loop
